# Supplementary material
Source: publisher figshare collection journal article supplement (https://gsapubs.figshare.com/ndownloader/files/34171776)
Supplement: Supplementary file 1 [file 34171776]

## Sheet: Table S4
Supplementary Table S4. Trace-element compositions (ppm) of zircon from the leucogranites and phengite gneisses.
Spot No.	Ti	Y	Nb	La	Ce	Pr	Nd	Sm	Eu	Gd	Tb	Dy	Ho	Er	Tm	Yb	Lu	Hf	Eu*	Ce*	(Lu/Dy)N	Hf/Y	ƩREE	Ti-in-zircon Temperature (°C)
Leucogranite YK173-10a: Zircon core
1	6.2	2139	22.9	0.026	74.9	0.04	0.95	3.48	0.524	27.1	10.46	150	66.4	341	75.6	747	159.2	12520	0.164961	569.442	10.6133	5.8532	1656.68	n.c.
2	4.8	1391	20.3	b.d.	45.9	0.031	0.45	2.1	0.35	19.3	7.43	103.4	45	238	53.9	534	110.8	13970	0.168075	1186.91	10.7157	10.0431	1160.66	n.c.
3	8.3	1856	31	0.14	45.6	0.084	0.97	3.6	0.47	24.4	9.85	146.3	59.7	291	67.8	681	145.7	10890	0.153312	103.097	9.95899	5.86746	1476.61	n.c.
4	39.3	1349	134.5	0.235	18.1	0.45	3.5	3.95	0.187	16.1	6.36	97.6	40.6	250	71.7	907	232	25700	0.0716892	13.6466	23.7705	19.0511	1647.78	n.c.
5	4.7	1198	6.7	0.0094	56	0.031	0.79	2.78	0.65	16.5	6.57	86.7	37.8	192	42.9	411	97	9260	0.293408	804.318	11.188	7.72955	950.73	n.c.
6	2.2	822	2.83	0.0072	37.8	0.071	0.98	3.02	1.15	16.8	5.16	68.9	29.09	142.8	31.1	317	73.1	8460	0.493587	409.903	10.6096	10.292	726.978	n.c.
7	21.8	1974	22.5	0.112	79.7	0.206	1.8	4.96	0.43	27.6	10.9	157.2	61.7	316	69.3	675	138.7	11390	0.112356	128.647	8.82316	5.77001	1543.61	n.c.
8	21	3540	66.2	10.7	136.6	4.4	19	10.8	0.6	57	21	271.1	114	572	117.2	1183	247.1	13200	0.0739308	4.88109	9.11472	3.72881	2764.5	n.c.
9	3.5	2970	30.7	0.0056	137.6	0.049	1.53	5.23	0.92	43	16.9	231	96.8	474	104.9	1033	227	9390	0.187554	2036.62	9.82684	3.16162	2371.93	n.c.
10	1.2	214	11.6	0.089	6.1	0.14	1.35	1.18	0.099	2.8	0.86	11.7	5.49	27.5	6.7	70.2	17.6	10900	0.166509	13.3985	15.0427	50.9346	151.808	n.c.
11	3.4	1401	3.67	0.02	76.5	0.132	2.59	5.5	2.41	27.2	9.2	109.4	44.6	230	49.1	462	110.1	7370	0.602386	365.043	10.064	5.26053	1128.75	n.c.
12	3.7	3000	32.1	b.d.	110.2	0.076	1.62	6.09	0.54	48.8	18.18	241	103.2	474	99.9	919	201	11850	0.0957632	n.a.	8.34025	3.95	2223.61	n.c.
13	3.6	920	6.7	0.0065	49.3	0.066	0.82	2.5	0.71	16.6	5.06	71.3	28.4	153	32.8	346	73.3	9300	0.336944	583.583	10.2805	10.1087	779.862	n.c.
14	10	3960	69.1	0.131	81.9	0.074	1.08	4.73	0.206	46.8	20.8	295	126.9	626	134.7	1295	266	15350	0.0423289	203.947	9.01695	3.87626	2899.32	n.c.
15	12.6	3157	43.3	0.022	139.4	0.078	1.63	6.4	0.59	57.1	19.32	277	104.6	493	106.1	1001	204.1	11510	0.0943556	825.066	7.36823	3.64587	2410.34	n.c.
16	5.2	4260	12.3	0.1	103.5	0.123	2.66	9.2	1.34	66.5	25.6	331	139.7	668	141.5	1426	301	9580	0.165624	228.809	9.09366	2.24883	3216.22	n.c.
17	5.9	2750	11.1	0.035	76.8	0.167	3.82	9.1	2.06	54.5	18.6	243	93.7	439	91.9	853	179	9690	0.282795	246.294	7.36626	3.52364	2064.68	n.c.
18	7.7	1090	70.3	0.096	30.1	0.143	1.32	2.15	0.106	12	5.5	79	34.1	169	41	400	88	20300	0.0637998	62.9865	11.1392	18.6239	862.515	n.c.
19	15.8	3970	33	0.25	73.2	0.246	2.2	6.33	0.5	51.3	21.7	302	130.4	613	142.1	1407	296	13340	0.0848268	72.3699	9.80132	3.3602	3046.23	n.c.
20	59	1277	58.8	0.021	34.6	0.023	0.5	1.3	0.181	15.7	5.78	90	39.5	188.6	43.3	417	87.3	19140	0.122484	386	9.7	14.9883	923.805	n.c.
21	23.8	964	69.7	0.176	25.4	0.183	1.38	2	0.15	9.4	4.11	65.4	28.2	172	45	575	134.9	25600	0.105764	34.7006	20.6269	26.556	1063.3	n.c.
22	2.6	2817	15.5	0.013	145.6	0.106	1.88	7.1	1.14	45.4	15.9	224	92.8	466	105.4	1004	214.1	9720	0.19412	961.659	9.55804	3.45048	2323.44	n.c.
23	5.2	3480	28.5	0.22	174.7	0.175	2.15	7	1.24	56.2	18.9	268.6	117.8	553	125.7	1216	249	9290	0.19113	218.297	9.27029	2.66954	2790.68	n.c.
24	2.2	1006	44.9	0.109	38.7	0.148	1.43	2.37	0.271	16.4	5.61	76.6	31.1	158	35.32	358	74.1	19000	0.132891	74.7053	9.67363	18.8867	798.158	n.c.
25	4.9	2950	48.4	0.0081	101.2	0.033	0.82	4.28	0.345	34.1	14.2	217	91.7	451	108	1086	229	11500	0.0873059	1517.63	10.553	3.89831	2337.69	n.c.
26	1.7	1617	3.62	0.02	48.3	0.293	4.63	8.5	3.67	38.6	12.55	138.8	53.5	250.5	53.4	565	120.4	8240	0.619422	154.697	8.67435	5.09586	1298.16	n.c.
27	6.3	2390	32.2	b.d.	96.9	0.021	0.84	4.17	0.53	30	12.8	181	81.9	411	94.9	889	198	9940	0.144867	2853.92	10.9392	4.159	2001.06	n.c.
28	26.4	4440	48.6	0.51	76.7	0.353	2.6	7.06	0.386	61.4	25.4	363	148	746	161.9	1588	323	13490	0.0566793	44.3208	8.89807	3.03829	3504.31	n.c.
29	3.6	751	16.4	0.0114	40.9	0.062	0.7	1.72	0.29	14.6	4.44	60.2	24	115.9	26.13	265	58.3	11310	0.176922	377.189	9.68439	15.0599	612.253	n.c.
30	4.1	1786	10.8	b.d.	79.4	0.062	1.15	5.4	0.62	30.4	11.32	146.3	57.1	279	59.2	579	121.1	9420	0.147939	n.a.	8.27751	5.27436	1370.05	n.c.
31	2.7	973	5.17	b.d.	43.5	0.023	0.82	2.67	0.64	14.7	5.57	74.3	33.1	164.7	37.5	395	93.5	8150	0.312312	n.a.	12.5841	8.37616	866.024	n.c.
32	21.1	840	77.2	0.069	17.4	0.206	2.03	2.87	0.123	10.8	4.08	60	26.1	145.5	42.8	499	114	24600	0.0675423	35.7829	19	29.2857	924.978	n.c.
33	12.8	1456	78.2	0.063	24.7	0.07	0.83	1.02	0.098	11.1	5.12	78.6	40.3	216	51.8	567	133.3	20350	0.0890406	91.1931	16.9593	13.9766	1130	n.c.
34	1.9	1774	17.4	0.018	78.3	0.043	1.79	4.01	0.63	29.4	11.68	155	63.7	293	66.1	607	142.1	9050	0.177386	690.042	9.16774	5.10147	1452.77	n.c.
35	3.3	1176	6.88	b.d.	46.4	0.026	1	3.2	0.8	19.1	6.51	91.1	37.7	193.3	41	410	98.1	8010	0.31284	1209.98	10.7684	6.81122	948.239	n.c.
36	8.3	1362	47.3	0.06	42.4	0.079	1.06	2.64	0.54	16.5	7.22	100.7	44.4	219	51	531	108.5	13800	0.250134	150.995	10.7746	10.1322	1125.1	n.c.
37	0.9	1580	1.39	0.015	58.6	0.384	8.52	12.5	6.4	53.9	14.6	156	57.8	243	54.8	462	99.9	6880	0.753797	189.309	6.40385	4.35443	1228.42	n.c.
38	3.4	2048	12.6	b.d.	94.9	0.087	1.8	5.54	0.85	37	13.8	181.3	71	329	69.8	678	137.5	9800	0.181504	1809.73	7.58411	4.78516	1620.58	n.c.
39	5.7	1470	19.1	0.018	54.5	0.046	0.56	2.74	0.53	18	7.44	105.4	47.1	229.3	52.3	516	114.5	9690	0.230721	464.372	10.8634	6.59184	1148.43	n.c.
Leucogranite YK173-10a: Zircon mantle
40	2.8	533	60.2	b.d.	22.8	b.d.	0.127	0.48	0.045	4.12	1.89	31.2	14.7	72.3	16.15	163.1	39.1	24300	0.0978288	n.a.	12.5321	45.591	366.012	711.051
41	1.5	450	24	0.12	10.99	0.17	1.04	1.27	0.091	4.24	1.77	24.3	10.63	56.4	14.33	141.9	29	20580	0.119889	18.8654	11.9342	45.7333	296.251	664.251
42	4.3	579	50.6	0.028	27.3	0.071	0.38	0.54	0.178	4.61	1.94	31	14.46	93.3	23.46	270	67	20300	0.344902	150.12	21.6129	35.0604	534.267	746.189
43	1.6	761	53.9	0.158	19.8	0.196	1.98	1.81	0.213	6.7	3.05	46.4	19.94	113.2	26.3	308	70.8	20690	0.186994	27.5863	15.2586	27.1879	618.547	668.871
44	5.3	604	54.6	0.052	22.9	0.053	0.41	0.78	0.053	5.2	2.25	35.2	15.49	86.1	21.2	219.6	47.3	22500	0.0804545	106.95	13.4375	37.2517	456.588	764.292
45	7.7	617	57	0.28	22.6	0.25	2.48	2.07	0.39	8.6	3.37	41.9	17.31	79.2	19.1	202	39.5	24700	0.282588	20.9432	9.42721	40.0324	439.05	798.37
46	3.2	453	38.6	0.0026	12.07	0.0071	0.126	0.27	0.08	3.1	1.69	24.3	11.07	69	18.1	207	51.3	18340	0.267332	688.773	21.1111	40.4857	398.116	721.712
47	5.1	474	65.4	0.032	16.8	0.029	0.18	0.6	0.066	3.7	1.76	25.4	11.2	56.4	13.9	148	29.1	23040	0.135423	135.213	11.4567	48.6076	307.167	760.911
48	5.6	425	40.8	0.054	13.3	0.096	0.77	0.57	0.16	3.7	1.81	26.4	12.2	54.7	13.46	138	30.6	23400	0.336826	45.2901	11.5909	55.0588	295.82	769.172
49	2.2	529	48.3	0.166	22.5	0.31	1.7	1.78	0.198	6	2.41	31.7	13.6	69.3	17.2	185.7	40.9	24110	0.185227	24.3182	12.9022	45.5766	393.464	692.395
50	5.8	701	52.2	0.216	28	0.26	2.03	2.78	0.3	11.7	3.51	52	20.6	96.4	22.1	226	49.7	21600	0.160816	28.9687	9.55769	30.8131	515.596	772.307
51	2.8	554	44.1	0.0084	18.9	0.0071	0.22	0.63	0.062	4.11	1.65	26.4	14.2	72.3	19.5	225	54.2	20200	0.117794	600.036	20.5303	36.4621	437.188	711.051
52	2.8	560	73.9	0.142	29.6	0.114	1.05	1.15	0.165	5.6	2.39	35.3	14	71	17	183.8	36.8	28700	0.198776	57.04	10.4249	51.25	398.111	711.051
53	3.5	434	32.3	0.118	19.1	0.152	1.11	1.18	0.089	4.9	1.97	23.7	10.96	53.7	12.95	134.8	29.3	24940	0.113155	34.9667	12.3629	57.4654	294.029	729.004
54	4.2	464	59.6	0.025	16.63	0.016	0.071	0.46	0.09	3.4	1.67	27.9	11.8	60.3	14.19	156.2	35.4	24090	0.220013	203.867	12.6882	51.9181	328.152	744.194
55	6.2	537	40.5	0.238	17.4	0.336	2.06	1.93	0.292	10.3	2.87	36.5	16	74	17.81	183	40.6	23300	0.200221	15.0861	11.1233	43.3892	403.336	778.321
56	2.5	584	61.1	0.023	20.7	0.011	0.132	0.3	0.053	6.2	2.13	36.1	15	72.8	17.1	175	39	24300	0.118807	319.076	10.8033	41.6096	384.549	702.19
57	2.3	464	48	b.d.	12.57	0.014	0.071	0.65	0.026	3.37	2.09	28	12.05	54.6	12.8	138.5	30.1	24830	0.0537063	868.23	10.75	53.5129	294.842	695.777
58	1.6	662	48.4	b.d.	14.93	0.008	0.071	0.46	0.123	5.8	2.24	39.2	18.3	96.7	23.47	267	63.3	21600	0.230216	n.a.	16.148	32.6284	531.603	668.871
59	1.1	408	51	0.0157	15.9	0.027	0.27	0.21	0.035	2.57	1.49	23.8	10.57	54.6	14.5	152.1	35.8	22600	0.145652	189.343	15.042	55.3922	311.888	642.696
60	2.1	529	39.5	b.d.	11.38	b.d.	0.16	0.4	0.074	4.17	2.08	30.8	12.7	66.6	15.1	173	34.7	23110	0.175169	1513.17	11.2662	43.6862	351.168	688.881
61	7.1	545	60	0.44	27.2	0.48	3.7	3.17	0.25	8	2.84	32.1	14	70.6	17.3	181	38.4	24990	0.151771	14.5113	11.9626	45.8532	399.48	790.77
62	5.5	592	64.4	0.215	23.9	0.27	1.7	1.51	0.141	7	2.64	35.7	16.63	86.8	19.91	240	50.9	24700	0.132588	24.321	14.2577	41.723	487.316	767.569
63	1.9	338	46.6	b.d.	17	0.0103	0.198	0.21	0.035	2.95	1.11	20.8	8.28	39.6	9.64	92.1	18	23290	0.135947	n.a.	8.65385	68.9053	209.934	681.413
64	7.7	593	71	0.239	32.5	0.243	1.52	1.48	0.205	5.5	2.69	38.2	16.23	78.8	17.31	187	39.5	23800	0.219667	33.0648	10.3403	40.1349	421.417	798.37
65	1.8	419	49.9	b.d.	18.7	b.d.	0.106	0.35	0.028	4.22	1.53	21.1	9.89	57.2	13.8	134	27.8	23620	0.0704355	1312.1	13.1754	56.3723	288.731	677.43
66	1.5	348	36.1	0.007	11.72	0.04	0.14	0.16	0.073	3.08	1.76	17.41	9.44	45.1	11.12	107.9	23.7	23290	0.317915	171.725	13.6129	66.9253	231.65	664.251
67	2.1	360	38.6	0.188	14.3	0.19	1.34	1.5	0.2	4.4	1.69	23.9	9.29	46.3	10.8	113.2	24.6	22730	0.238003	18.5509	10.2929	63.1389	251.898	688.881
68	1.2	339	17.1	0.008	11.9	b.d.	0.123	0.105	0.052	2.17	1.137	19.7	9.28	48.9	12.5	141.2	34.4	18110	0.333045	576.649	17.4619	53.4218	281.478	648.637
69	2.7	497	58.4	0.017	18.4	b.d.	0.16	0.72	0.07	4.8	1.88	29.2	12.62	61.8	15.1	165	36.5	22120	0.115116	642.509	12.5	44.507	346.27	708.189
70	2.2	426	34.3	0.047	18.5	0.136	0.54	0.62	0.061	4.2	1.65	22.9	10.97	62.7	16.7	194	45.4	19770	0.115567	56.7333	19.8253	46.4085	378.424	692.395
71	3.3	544	93.6	0.012	20.5	0.0144	0.069	0.72	0.105	3.38	1.63	28	13.67	83	21.8	246	61.1	23600	0.205773	382.355	21.8214	43.3824	480	724.204
72	3.9	455	50.8	0.29	22.6	0.36	2.49	2.7	0.32	7.3	2.16	26.9	12.4	64.8	15.3	174	41.9	17600	0.220359	17.1492	15.5762	38.6813	373.52	737.962
73	3	426	41.9	0.133	15.9	0.166	1.04	1.21	0.088	3.4	1.56	21.7	11.63	60	16.7	201.8	48.1	19230	0.13264	26.2363	22.1659	45.1408	383.427	716.53
74	1.9	483	42.6	0.014	18.6	0.032	0.114	0.95	0.123	4.97	1.87	30	12.46	65.3	14.5	158	33.4	20610	0.173057	215.456	11.1333	42.6708	340.333	681.413
75	7.4	701	65.1	0.93	35.1	1.5	8.2	5.1	0.71	12.6	3.94	47.1	18.9	98.7	23.4	246	58.2	21800	0.270777	7.28626	12.3567	31.0984	560.38	794.633
76	8.2	647	87.5	0.078	16.9	0.097	0.68	0.92	0.114	4.5	2.16	32.8	15.5	88	23.3	270	62.5	23890	0.171289	47.6363	19.0549	36.9243	517.549	804.343
77	2.68	385	59.9	b.d.	16.9	b.d.	0.104	0.47	0.028	1.41	1.08	18	9.49	53.5	13.77	178.3	40.3	22570	0.105153	n.a.	22.3889	58.6234	333.355	707.607
78	1.9	659	72.4	0.022	24.2	0.039	0.39	0.72	0.018	4.9	2.24	39.3	16.4	93.6	24.9	272	60.7	21000	0.0292976	202.561	15.4453	31.8665	539.429	681.413
79	4.8	464	60.3	0.046	18.72	0.055	0.58	0.59	0.163	3.63	1.48	24.4	11.46	54.7	13.64	138.4	30	22680	0.340512	91.2494	12.2951	48.8793	297.864	755.629
80	3.6	486	47.2	0.076	16.1	0.092	0.5	0.83	0.123	5.4	1.99	29.7	12.2	59.8	12.81	126.5	26.9	22210	0.17762	47.2074	9.05724	45.6996	293.021	731.32
81	3.9	450	38.8	0.128	16.4	0.17	1.16	0.97	0.081	5.39	1.77	26.7	11.8	65.5	17.4	218	51.3	14240	0.1083	27.2583	19.2135	31.6444	416.769	737.962
82	6.6	581	78.3	0.036	17	0.029	0.25	0.38	0.075	3.93	1.91	30.9	14.7	87.4	23.7	259	63.1	24580	0.187628	128.998	20.4207	42.3064	502.41	784.025
83	1.8	428	19.64	b.d.	2.9	0.0069	0.0011806	0.43	0.036	2.74	1.38	20.8	10.2	59.1	14.74	150.8	34.9	25960	0.101395	228.767	16.7788	60.6542	298.035	677.43
84	5.8	557	55.6	0.093	20.1	0.165	1.5	1.33	0.157	6.1	2.43	36.9	15.47	84.4	21.1	232	50.4	23720	0.168513	39.783	13.6585	42.5853	472.145	772.307
85	0.8	439	36.5	0.0134	7.29	0.008	0.1	0.5	0.054	2.03	1.44	24.3	10.64	60.6	15.11	177.1	40.6	17980	0.163864	172.629	16.7078	40.9567	339.785	621.629
86	3.7	560	45.6	0.0057	16.1	0.0052	0.18	0.53	0.042	4.1	1.69	28.9	14.9	79	23.4	283	72.1	20880	0.087105	725.056	24.9481	37.2857	523.953	733.583
87	2.9	367	42	0.024	10.4	0.018	0.108	0.24	0.098	3	1.21	21.9	9.12	49.5	12.66	134.3	30.5	17900	0.353088	122.681	13.9269	48.7738	273.078	713.83
88	7.5	841	80	0.092	24.2	0.091	0.75	1.26	0.09	7.8	3.74	56.4	25.4	123.6	29.2	287	64.3	25100	0.0877675	64.8463	11.4007	29.8454	623.923	795.892
89	3.6	476	40.7	0.065	13.82	0.058	0.47	0.97	0.032	4.6	1.7	27	12.35	62.1	15.52	173.1	37.1	24000	0.0463136	55.1851	13.7407	50.4202	348.885	731.32
90	1020	745	116	0.2	22.5	0.56	5.5	3.4	0.39	10.7	3.81	47.4	20	101.9	28.5	333	77.9	24830	0.197677	16.4838	16.4346	33.3289	655.76	1639.3
91	32.7	2220	225	0.91	36.7	1.07	7.4	7.2	0.4	22.2	9.1	140	63.7	380	98.5	1283	316	23570	0.0967255	9.11881	22.5714	10.6171	2366.18	955.923
92	2.2	487	33.3	b.d.	8.26	.b.d.	0.016	0.47	0.106	3.31	1.69	27	12.3	62.2	15	155	33.6	22300	0.259816	n.a.	12.4444	45.7906	318.956	692.395
93	1.4	458	40.6	0.123	12.1	0.16	0.86	1.4	0.088	4.1	1.69	27.1	12.49	59.4	14.23	154	33	23150	0.112292	21.1474	12.1771	50.5459	320.741	659.364
94	4.5	484	45.7	0.0101	15.5	0.025	0.15	0.57	0.026	4.2	1.82	28.6	12.3	64.1	15.3	160	35.9	22790	0.051373	239.158	12.5524	47.0868	338.501	750.069
95	2.2	448	25.9	0.123	9	0.127	1	0.9	0.081	4.6	1.85	26.5	10.74	57.8	14.1	150.4	34.2	21400	0.121705	17.6552	12.9057	47.7679	311.421	692.395
96	7.9	768	59.6	0.66	41.4	0.79	5	4.55	0.42	13.7	4.28	61.9	22.3	118	29.6	298	65.3	18300	0.162632	14.0572	10.5493	23.8281	665.9	800.796
97	0.4	305	26	0.012	6.87	0.0065	0.051	0.32	0.035	1.54	0.96	16.1	7.12	40.4	9.64	99.9	24	22100	0.152425	190.719	14.9068	72.459	206.954	579.139
98	b.d.	302	12.26	0.053	4.8	0.05	0.28	0.23	0.037	1.6	0.92	14.1	7.46	40.6	10.03	104	22.4	22270	0.186467	22.8614	15.8865	73.7417	206.56	n.a.
99	0.9	561	55.9	0.012	21.9	0.024	0.39	0.75	0.098	5	2.7	34.6	15.4	67.3	14.66	145	29.6	23800	0.154716	316.397	8.55491	42.4242	337.434	629.3
100	3.7	639	50.6	0.361	26.7	0.61	4.18	4.68	0.37	8.8	3.01	39.2	15.86	91.9	25.4	298	73.8	18530	0.176263	13.9501	18.8265	28.9984	592.871	733.583
101	6	547	96.4	0.151	21.7	0.25	1.66	1.25	0.098	5.1	1.86	26.5	13.23	86.5	25.9	323	85.2	26290	0.118661	27.3833	32.1509	48.0622	592.399	775.355
102	0.5	436	41.1	b.d.	8.41	b.d.	0.18	0.55	0.023	2.58	1.79	26.5	11.7	49.8	13	126.6	28.3	21900	0.0590283	n.a.	10.6792	50.2294	269.435	592.343
103	1.4	606	47.7	0.06	21.4	0.093	0.65	1.32	0.123	5.3	2.74	33.8	15.18	85.9	20.91	228.2	51.5	19660	0.142169	70.2395	15.2367	32.4422	467.176	659.364
104	6.1	552	38.1	0.0085	7.73	0.004	0.14	0.55	0.04	4.9	2.01	28.8	14.1	76.3	19.7	228	49	23250	0.0744911	325.031	17.0139	42.1196	431.282	776.848
105	3.3	626	57.2	0.0044	18.1	0.0007	0.13	0.35	0.052	4.55	2.37	36.3	15.75	74.9	19.7	205	44	22010	0.125976	n.a.	12.1212	35.1597	421.207	724.204
106*	24	877	75	10	72	6	33	17	1.23	29.3	7.4	71	24.2	118.5	27.9	305	69.4	24590	0.168489	2.27898	9.77465	28.0388	791.93	918.268
107*	9.3	684	45.9	1.97	145	3.08	17.9	11.4	0.89	20.4	5.73	53.9	18.3	82.1	18.9	186	40.5	24400	0.178421	14.4326	7.51391	35.6725	606.07	816.506
108*	16.3	1143	116.5	0.493	39.7	0.774	4.4	3.98	0.319	13.8	5.08	67.8	31.4	186	51.9	559	127	23200	0.131593	15.7573	18.7316	20.2975	1091.65	874.425
109*	2790	940	149.4	5.43	89	10.1	63.2	25.9	1.93	35.8	8.7	77	25.4	109	24	237	49.9	22910	0.193771	2.94655	6.48052	24.3723	762.36	2019.51
110*	9.6	609	33.9	4.1	16.9	1.42	6.1	2.64	0.204	5.9	2.61	39.1	16	82.8	22.2	230	48.4	25540	0.158025	1.71726	12.3785	41.9376	478.374	819.619
111*	5.5	493	34	0.096	17.9	0.14	1.08	0.89	0.082	3.6	1.83	27.6	12.95	68.5	19.6	225	50	21850	0.140053	37.8563	18.1159	44.3205	429.268	767.569
112*	13.7	750	85.6	1	41	1.5	10	6.8	0.65	16	4.9	55	25.1	122	30.3	346	73	27700	0.190512	8.20772	13.2727	36.9333	733.25	855.812
Phengite gneiss YK173-10b: Zircon core
Spot No.	Ti	Y	Nb	La	Ce	Pr	Nd	Sm	Eu	Gd	Tb	Dy	Ho	Er	Tm	Yb	Lu	Hf	Eu*	Ce*	(Lu/Dy)N	Hf/Y	ƩREE	Ti-in-zircon Temperature (°C)
1	4.93851	1320.46	1.90485	0.0364509	23.3991	0.283377	5.45588	8.83053	2.35167	34.0993	11.582	117.936	42.5653	191.661	39.6257	376.268	75.8414	10229.8	0.414319	56.448	6.43071	7.74711	929.936	n.c.
2	1.64617	1020.63	4.59752	b.d.	39.0378	0.0376268	0.470335	2.10475	0.552643	13.287	5.67929	76.1942	33.6289	164.029	38.5674	422.125	95.3603	11135.2	0.319489	n.a.	12.5154	10.9101	891.075	n.c.
3	5.52643	2403.41	9.61834	0.0164617	103.003	0.195189	2.70442	7.64294	3.39817	46.9159	16.8145	206.477	85.1306	373.916	82.8965	787.81	158.855	9782.96	0.548628	445.523	7.69362	4.07045	1875.78	n.c.
4	9.75944	1394.54	5.36181	0.01411	53.2654	0.0470335	1.74024	3.90378	1.16408	21.0475	7.9369	106.296	43.9763	222.233	47.8565	458.576	99.8285	10594.3	0.392612	506.947	9.39159	7.59696	1067.89	n.c.
5	2.35167	1693.2	3.52751	0.152859	43.3884	0.071726	1.19935	3.99784	1.58738	30.6893	11.9935	148.155	57.9687	264.563	58.7918	529.126	110.529	9300.87	0.438125	101.595	7.46032	5.49306	1262.21	n.c.
6	2.23409	1001.81	2.22233	0.0164617	61.0259	0.13287	3.23355	5.99677	2.50453	29.5135	8.12503	98.4175	35.863	158.385	32.1003	305.717	64.7886	8054.48	0.575548	319.925	6.58303	8.03991	805.821	n.c.
7	2.58684	1389.84	1.85782	0.0364509	31.8652	0.310421	4.59752	8.23085	3.12772	36.2158	11.4409	117.584	45.6225	212.826	48.0917	483.269	98.5351	9277.35	0.553836	73.4465	8.38	6.67513	1101.75	n.c.
8	12.9342	897.163	3.7274	0.0270442	29.0432	0.0823085	1.45804	2.56332	1.04649	14.9331	4.39763	65.8468	28.5728	137.103	33.041	331.586	72.9019	8501.3	0.517111	150.928	11.0714	9.47575	722.602	n.c.
9	5.87918	2151.78	5.02082	b.d.	86.6591	0.212826	3.91554	9.40669	4.75038	54.3236	18.4606	203.42	77.958	326.883	66.9051	609.083	129.46	8242.61	0.64245	n.a.	6.36416	3.8306	1591.43	n.c.
10	13.9925	2292.88	6.13787	0.0164617	76.5469	0.157562	2.83377	7.27843	3.23355	41.8598	14.4628	190.485	79.7217	359.806	84.4251	819.558	178.727	8219.1	0.566351	368.51	9.38272	3.58462	1859.11	n.c.
11	1.411	1305.18	3.99784	b.d.	57.7336	0.0740777	1.22287	4.28004	2.10475	25.0453	9.57131	114.291	45.9752	211.886	41.7422	417.422	88.3053	8336.68	0.621493	n.a.	7.72634	6.38739	1019.65	n.c.
12	3.76268	833.668	3.51575	b.d.	35.863	0.0999461	1.22287	3.3041	1.02298	14.4628	5.64401	65.0238	27.8673	130.165	29.8662	322.179	70.6678	8665.91	0.452415	1282.46	10.868	10.3949	707.39	n.c.
13	3.40993	2015.38	3.59806	0.00705502	54.794	0.184606	3.37465	8.34844	2.53981	43.3884	14.9331	173.083	65.8468	312.772	70.9029	690.216	135.104	9630.1	0.407976	372.259	7.80571	4.7783	1575.49	n.c.
14	0.246926	2116.51	6.86688	b.d.	120.758	0.144628	3.49223	9.40669	3.8685	55.2643	16.7557	209.299	77.2525	336.289	62.2017	557.346	110.764	7854.59	0.518711	3589.82	5.29213	3.71111	1562.84	n.c.
15	5.52643	1575.62	6.66699	0.0105825	92.4207	0.252805	4.79741	7.5959	3.52751	40.9191	12.2287	141.1	53.383	251.629	52.4423	525.599	108.059	6878.64	0.611701	438.093	7.65833	4.36567	1293.97	n.c.
16	3.40993	1134.68	2.5986	0.01411	27.8673	0.119935	1.92837	4.24477	1.51683	21.9881	7.71349	90.3042	35.3927	180.726	41.8598	429.18	91.5977	10629.6	0.479997	166.09	10.1432	9.36788	934.454	n.c.
17	6.81985	1587.38	4.1507	b.d.	42.6829	0.102298	1.92837	4.22125	1.86958	23.5167	8.97163	115.232	51.6192	252.805	60.2028	612.611	140.983	8148.55	0.573665	550.898	12.2347	5.13333	1316.75	n.c.
18	6.11435	2092.99	6.77282	0.0270442	126.755	0.292783	4.96203	8.87756	4.89148	46.7983	15.474	180.961	74.6656	325.707	63.4952	598.501	121.817	7254.91	0.733672	349.253	6.73164	3.46629	1573.22	n.c.
19	4.93851	1640.29	3.69213	0.0329234	65.6117	0.315124	4.84445	8.61888	2.53981	43.5059	11.8407	134.751	54.5588	268.091	58.5567	594.973	124.874	9971.09	0.400982	157.933	9.26702	6.07885	1373.11	n.c.
20	4.35059	1152.32	5.4794	0.01411	40.096	0.0917152	1.81079	4.18598	2.16354	22.8112	7.74876	101.122	39.9784	179.903	41.6246	406.839	87.835	8548.33	0.676886	273.276	8.68605	7.41837	936.224	n.c.
21	5.87918	1753.17	9.88878	0.0164617	81.603	0.0693743	2.21057	5.30302	1.48155	28.808	10.1122	128.519	55.7346	279.849	64.671	650.238	143.217	10182.7	0.366457	592.044	11.1436	5.80818	1451.83	n.c.
22	5.87918	1654.4	2.26936	0.0305717	25.7508	0.257508	4.82093	10.4649	4.38587	50.2082	14.6039	156.033	60.6732	261.036	56.9105	530.302	110.764	7548.87	0.584956	71.1574	7.09872	4.5629	1286.24	n.c.
23	4.11543	2222.33	10.7001	0.0270442	81.8382	0.131694	2.18706	5.6205	2.81025	40.2136	15.7562	189.31	79.9569	356.278	79.4865	764.294	163.089	9242.07	0.571471	336.218	8.61491	4.15873	1781	n.c.
24	0.587918	225.878	18.5782	0.0164617	43.0356	0.00587918	0.105825	0.258684	0.232816	3.01014	1.17584	14.8155	5.59698	28.808	7.43129	80.78	18.931	14545.1	0.806599	1072.55	12.7778	64.3935	204.204	n.c.
25	2.93959	4926.75	4.70335	0.343344	304.542	2.82201	41.2719	59.1446	32.3355	227.76	59.4973	552.643	192.484	759.59	132.164	1213.46	225.761	6008.52	0.851741	75.8555	4.08511	1.21957	3803.82	n.c.
26	3.99784	1064.13	4.84445	b.d.	41.7422	0.0823085	1.15232	2.89256	0.78781	17.9903	5.70281	77.8404	35.0399	170.144	43.6235	496.203	112.057	9959.33	0.333876	n.a.	14.3958	9.35912	1005.25	n.c.
27	2.35167	814.855	3.31586	b.d.	31.9828	0.0764294	0.587918	1.49331	0.599677	10.3474	3.98609	59.027	24.3398	121.111	30.219	317.476	74.9008	9853.51	0.466391	n.a.	12.6892	12.0924	676.147	n.c.
28	3.99784	3480.48	5.66753	0.0764294	101.122	0.693743	11.1704	20.2244	8.46602	97.5944	31.1597	339.817	124.639	545.588	105.825	1011.22	196.365	8912.84	0.582576	107.671	5.77855	2.56081	2593.96	n.c.
29	1.88134	1082.95	4.22125	b.d.	40.5664	0.0435059	0.729019	1.95189	0.705502	17.2848	5.71456	76.4294	32.6883	170.614	41.7422	446.818	101.24	10112.2	0.371332	n.a.	13.2462	9.33768	936.524	n.c.
30	7.8781	1507.42	5.29126	0.01411	55.0291	0.0740777	1.38749	3.57454	2.35167	24.3398	8.98339	110.176	49.5027	231.64	57.2632	572.632	126.167	8242.61	0.770782	417.32	11.4514	5.46802	1243.14	n.c.
31	2.58684	1706.14	7.67821	0.00705502	76.5469	0.0587918	1.43452	4.75038	1.88134	36.3333	12.0641	162.265	63.3776	279.849	55.2643	511.489	100.064	9818.23	0.437798	921.52	6.16667	5.75465	1305.39	n.c.
32	12.4639	1724.95	4.19774	0.0470335	52.5599	0.157562	3.37465	5.52643	2.85728	32.6883	10.3238	133.105	56.3226	276.322	60.3204	611.435	128.049	7384.25	0.649918	149.696	9.62014	4.28085	1373.09	n.c.
33	1.05825	551.467	1.65793	b.d.	15.1683	0.0258684	0.693743	1.65793	0.740777	9.40669	3.21003	40.3312	18.2255	91.5977	22.3409	223.409	50.3258	9406.69	0.573469	389.316	12.4781	17.0576	477.137	n.c.
34	7.52535	3521.63	8.77174	0.01411	114.291	0.292783	4.44466	10.5825	4.90324	74.9008	25.7508	309.245	122.287	546.764	118.289	1147.62	224.585	7431.29	0.532438	435.974	7.26236	2.11018	2703.97	n.c.
35	7.40777	2034.2	1.52859	0.0164617	26.9267	0.262212	4.35059	9.28911	4.37411	48.7972	16.3441	184.606	74.0777	309.245	69.3743	676.106	144.863	7313.7	0.6281	100.486	7.84713	3.59538	1568.63	n.c.
36	6.11435	2563.32	6.59644	0.105825	206.477	0.623193	9.64186	18.8134	11.4056	98.7703	25.8684	265.739	100.534	397.433	74.7832	664.348	134.868	6666.99	0.808902	197.129	5.07522	2.60092	2009.41	n.c.
37	2.82201	1694.38	6.70227	0.0164617	87.7174	0.142276	2.25761	5.86742	2.52805	40.8015	12.5932	158.738	63.1424	259.86	54.4412	492.675	94.4197	8442.51	0.499513	444.392	5.94815	4.98265	1275.2	n.c.
38	15.2859	1863.7	2.19881	0.0435059	37.0388	0.242222	4.20949	7.76052	4.26829	46.2104	14.8155	161.09	62.5545	271.618	58.7918	543.236	112.175	6502.38	0.689068	88.4628	6.9635	3.48896	1324.05	n.c.
39	8.34844	3221.79	5.50291	0.11288	144.981	0.799569	13.6397	16.8145	9.59483	89.3636	24.575	279.967	110.999	458.576	92.5383	841.899	169.438	7125.57	0.756727	118.32	6.05208	2.21168	2253.3	n.c.
40	10.8177	3809.71	3.163	0.201068	152.388	1.79903	27.397	37.8619	18.2255	164.852	42.3301	418.598	144.863	573.808	112.175	1005.34	191.661	6831.61	0.705267	62.1221	4.57865	1.79321	2891.5	n.c.
41	22.6	3840	3.67	0.302	263.7	3.22	41.3	54.4	30.1	194	47.2	475	161	586	116.1	1046	201.3	6160	0.895756	65.5637	4.23789	1.60417	3219.62	n.c.
42	2.7	1308	7.71	b.d.	37.3	0.03	0.49	2.66	0.59	16.3	7.52	101.9	46.7	234	51.8	526	106.2	12420	0.273931	1211.31	10.422	9.49541	1131.49	n.c.
43	3.3	1271	7.77	b.d.	70.3	0.017	0.85	3.43	1.35	23.8	8.79	112	45.4	198	42.3	405	77.2	8560	0.456796	3413.26	6.89286	6.73485	988.438	n.c.
44	4.4	1515	5.12	0.013	51.2	0.151	1.92	4.45	1.57	28.2	10.86	124.3	56.3	239	53	545	109.3	8670	0.428468	283.331	8.79324	5.72277	1225.26	n.c.
45	0.8	1920	14	0.016	93.5	0.087	1.69	4.93	2.08	34.2	13.5	176	73.3	336	72.1	742	147.1	9670	0.489723	614.436	8.35795	5.03646	1696.5	n.c.
46	3.4	2720	2.46	0.059	91.9	1.31	16.6	25.6	11	96.3	27	305	107.4	414	83.2	779	140.1	7340	0.677303	81.0473	4.59344	2.69853	2098.47	n.c.
47	5	1034	2.6	0.012	27.8	0.158	2.43	4.9	1.25	24.3	7.64	85.5	37.2	162	33.7	347	67.6	9940	0.350213	156.535	7.90643	9.61315	801.49	n.c.
Phengite gneiss YK173-10b: Zircon mantle
48	6.23193	168.145	12.3463	b.d.	2.19881	0.00940669	0.0587918	0.329234	0.181079	2.30464	0.78781	11.9935	5.16192	23.8695	6.24369	73.0194	17.4024	14498.1	0.635532	n.a.	14.5098	86.2238	143.558	823.787
49	5.87918	183.43	11.0529	b.d.	39.3905	0.0223409	0.152859	0.470335	0.284552	2.70442	1.10529	13.4045	4.45642	21.6354	3.91554	39.9784	8.30141	14157.1	0.771339	1053.36	6.19298	77.1795	135.826	818.524
50	3.05717	272.794	32.1003	b.d.	36.5685	0.00705502	0.0940669	0.246926	0.176375	2.56332	0.776052	14.8155	7.0315	43.3884	12.5814	167.086	44.329	15967.9	0.677762	n.a.	29.9206	58.5345	329.662	763.04
51	3.76268	243.398	14.0277	b.d.	29.1607	0.01411	0.0388026	0.152859	0.221057	2.28112	0.987703	16.109	6.76106	39.0378	9.489	99.9461	23.9871	13098.8	1.14448	n.a.	14.8905	53.8164	228.184	779.976
52	3.88026	241.046	20.5771	0.0105825	37.0388	b.d.	b.d.	0.235167	0.118759	2.76322	0.893636	12.9342	7.07854	37.1564	9.15977	103.944	22.5761	13980.7	0.450398	n.a.	17.4545	58	233.887	782.538
53	5.64401	181.314	2.61036	0.0164617	2.49277	b.d.	b.d.	0.0705502	0.0905394	1.31694	0.64671	9.93582	5.1972	26.3387	6.83161	69.4919	13.8749	11864.2	0.908092	n.a.	13.9645	65.4345	136.298	814.869
54	2.23409	169.556	12.9577	0.01411	32.1003	0.0117584	0.0611435	0.376268	0.230464	2.61036	1.04649	10.8177	3.98609	20.9299	5.25599	52.7951	10.8059	13157.6	0.710932	611.022	9.98913	77.6006	141.042	738.562
55	1.88134	52.3247	4.33884	b.d.	4.64455	b.d.	b.d.	0.293959	0.176375	0.905394	0.470335	4.35059	1.43452	6.56117	1.29342	13.4045	2.68091	13075.3	1.04214	n.a.	6.16216	249.888	36.2024	725.683
56	6.11435	83.2492	1.42276	0.0105825	1.07001	b.d.	0.0435059	0.152859	0.101122	0.964186	0.587918	6.58468	2.50453	8.23085	1.70496	18.1079	4.10367	12369.8	0.805274	74.3712	6.23214	148.588	44.1679	822.06
57	4.93851	261.036	23.2816	b.d.	26.3387	0.0117584	0.188134	0.317476	0.250453	3.05717	1.30518	17.1672	8.31316	36.6861	9.47724	115.585	28.3377	15321.1	0.777203	970.862	16.5068	58.6937	247.039	803.101
58	5.0561	67.0227	2.09299	b.d.	2.68091	0.0188134	0.0834844	0.0940669	0.176375	1.91661	0.611435	5.69105	1.64617	7.76052	1.76375	11.8759	2.64563	13428.1	1.26992	80.6861	4.64876	200.351	36.9683	805.154
59	3.17476	263.387	16.5793	b.d.	43.0356	0.0188134	0.105825	0.435059	0.329234	3.62158	1.1288	16.109	7.30194	35.7454	8.72471	93.9493	22.2233	14392.2	0.801873	3547.12	13.7956	54.6429	232.729	766.073
60	8.34844	92.8911	2.36343	0.0105825	3.31586	b.d.	0.1411	0.634952	0.196365	1.43452	0.611435	6.70227	2.66915	12.2287	2.99838	31.2772	5.89094	12934.2	0.629018	133.061	8.78947	139.241	68.115	851.059
61	3.29234	283.377	22.8112	0.00705502	33.2762	b.d.	0.0270442	0.0587918	0.150507	3.05717	0.940669	13.9925	7.00798	45.5049	11.7701	156.151	39.9784	14251.1	1.08533	n.a.	28.5714	50.2905	311.919	769.015
62	1.52859	106.178	7.05502	b.d.	9.19504	0.0211651	0.0493851	0.0235167	0.123463	1.21111	0.482093	8.11327	3.23355	13.287	2.52805	27.5146	6.44358	12946	2.23655	n.a.	7.94203	121.927	72.2229	710.597
63	2.58684	158.15	6.14962	0.0105825	35.0399	0.01411	0.235167	0.423301	0.388026	2.30464	0.952427	12.4639	4.11543	18.6958	3.59806	33.5113	7.33722	12557.9	1.20104	703.054	5.88679	79.4052	119.09	749.843
64	1.99892	209.652	27.0442	b.d.	34.5696	0.0117584	b.d.	0.0823085	0.105825	0.999461	0.776052	11.6408	5.58522	34.452	10.2651	131.106	38.9202	13592.7	1.128	n.a.	33.4343	64.8345	268.5	730.185
65	0.6	274	15.2	0.011	42.7	b.d.	0.16	0.33	0.29	4.42	1.15	17.4	7.67	37	7.61	86.4	18.5	13100	0.734097	n.a.	10.6322	47.8102	223.635	648.459
66	3	248.3	22.4	0	38.3	b.d.	0.041	0.1	0.039	2.9	1.05	13.1	7.78	44.4	11.53	165.3	42.4	14500	0.221406	n.a.	32.3664	58.3971	326.936	761.53
67	3.40993	66.1996	2.18706	0.0105825	3.25707	b.d.	0.199892	0.0705502	0.199892	1.752	0.470335	4.89148	1.66969	6.59644	1.68145	15.8738	3.43344	14180.6	1.73822	113.191	7.01923	214.21	40.1113	771.871
68	2.70442	174.259	5.7616	0.0270442	32.6883	0.00940669	0.0352751	0.811327	0.135221	3.76268	0.975944	12.5814	4.8562	20.6947	4.09191	43.3884	9.57131	14345.2	0.236604	502.482	7.60748	82.3212	133.629	753.318
69	3.05717	159.326	4.90324	b.d.	19.0485	0.00940669	0.376268	0.529126	0.377443	3.4452	1.10529	13.1694	4.67983	20.5771	5.53819	54.9116	11.7231	13381	0.854651	n.a.	8.90179	83.9852	135.488	763.04
70	3.17476	242.105	16.2265	b.d.	47.739	0.0246926	0.0176375	0.235167	0.15521	2.08123	1.21111	17.2848	6.6082	39.0378	7.91338	88.7756	18.8134	15368.2	0.67826	n.a.	10.8844	63.4774	229.891	766.073
71	2.70442	298.662	22.9171	b.d.	47.5038	b.d.	0.0388026	0.0705502	0.145804	2.08123	0.940669	16.109	8.00745	47.739	14.063	183.313	48.9148	14721.5	1.16328	n.a.	30.365	49.2913	368.925	753.318
72	8.58361	155.21	3.0219	0.0105825	2.50453	b.d.	b.d.	0.129342	0.15521	1.11704	0.693743	9.17152	5.04434	24.4574	6.47886	68.0809	14.4628	12934.2	1.24836	n.a.	15.7692	83.3333	132.262	853.727
73	5.99677	132.987	2.99838	b.d.	2.98662	0.01411	b.d.	0.317476	0.101122	2.06947	1.02298	9.86527	4.10367	20.1068	4.67983	50.7961	11.7584	12793.1	0.381403	103.793	11.919	96.1981	107.827	820.306
74*	3.40993	239.165	18.5782	0.00940669	34.2168	b.d.	0.0164617	0.270442	0.23164	2.23409	1.24639	14.698	7.63118	36.9213	8.71295	103.356	26.1036	14568.6	0.911065	1535.15	17.76	60.9145	235.651	771.871
75*	5.87918	76.0766	1.96365	0.0270442	1.90485	b.d.	b.d.	0.117584	0.130518	1.98716	0.57616	7.27843	2.42222	7.8781	1.71672	13.4045	2.86904	12675.5	0.825474	75.604	3.94184	166.615	40.2985	818.524
76*	3.99784	240.459	15.8738	0.01411	44.0939	0.00587918	b.d.	0.317476	0.28808	3.17476	0.964186	15.7562	6.61996	32.5707	7.72525	91.0097	21.6354	14580.4	0.877255	1186.97	13.7313	60.6357	224.18	785.036
77*	2.58684	179.433	12.3463	b.d.	33.3938	b.d.	b.d.	0.364509	0.138749	2.15178	0.799569	12.8166	5.35006	21.6354	4.7151	46.2104	9.0657	14251.1	0.47896	3113.99	7.07339	79.4233	136.613	749.843
78*	1.29342	186.017	15.8738	0.01411	32.2179	0.00823085	0.050561	0.199892	0.0870119	2.91607	0.78781	12.4639	4.92675	26.2212	5.7616	65.1413	15.8738	13345.7	0.3474	723.267	12.7358	71.7446	166.67	698.821
79*	3.99784	301.014	26.4563	0.0105825	37.274	0.00823085	0.0705502	0.364509	0.170496	1.82255	0.987703	14.698	7.83107	45.6225	13.7573	161.795	41.3894	13004.8	0.639506	979.205	28.16	43.2031	325.802	785.036
80*	2.46926	48.9148	1.52859	0.00705502	2.42222	b.d.	0.0317476	0.0470335	0.129342	0.317476	0.388026	4.42114	1.34045	5.56171	1.08177	9.52427	2.25761	12322.8	3.23597	206.194	5.10638	251.923	27.531	746.233
81*	3.2	213	21.9	0.01	37.2	b.d.	0.14	0.29	0.116	1.66	0.68	11.7	6.16	34.6	9.58	115.6	29.4	14700	0.511127	2884.21	25.1282	69.0141	247.137	766.712
Phengite gneiss YK173-10b: Zircon rim
82	0.352751	229.288	18.684	0.0164617	25.3981	b.d.	0.0752535	0.446818	0.0799569	2.23409	0.823085	12.2287	6.63172	35.6278	9.53603	121.346	31.1597	15391.7	0.244661	n.a.	25.4808	67.1282	245.598	571.887
83	3.52751	112.057	7.37249	0.0164617	10.9118	b.d.	b.d.	0.129342	0.117584	2.90432	0.870119	10.1122	3.59806	13.8749	2.85728	24.4574	5.65577	13533.9	0.586515	304.045	5.59302	120.776	75.5063	729.647
84	3.64509	72.9019	2.24585	0.0164617	0.729019	b.d.	0.0823085	0.117584	0.0740777	0.623193	0.399784	4.89148	2.33991	8.83053	2.04596	17.2848	3.60982	12510.9	0.836616	23.4559	7.37981	171.613	41.0484	732.347
85	6.23193	110.058	2.89256	0.0105825	1.45804	b.d.	0.0458576	0.117584	0.0658468	0.482093	0.564401	6.81985	3.53927	16.3441	5.3383	57.8512	15.6386	12675.5	0.845512	101.341	22.931	115.171	108.277	778.787
86	1.88134	165.793	11.0529	0.00940669	12.699	0.00587918	b.d.	0.0705502	0.0705502	1.1288	0.50561	7.40777	4.1507	27.397	7.77228	101.357	27.397	13780.8	0.7643	418.676	36.9841	83.1206	189.958	680.683
87	4.70335	88.8932	2.06947	b.d.	1.23463	b.d.	0.071726	0.1411	0.0964186	1.34045	0.411543	5.15016	2.48101	15.8738	4.9973	68.904	19.4013	11981.8	0.677789	48.582	37.6712	134.788	120.091	753.87
88	3.4	146	12.5	b.d.	0.87	0.013	b.d.	0.18	0.012	1.25	0.42	7.25	4.35	24	7.9	106.4	25.2	14590	0.0773417	36.004	34.7586	99.9315	177.844	726.633
89	2.82201	187.076	18.2725	0.0105825	36.4509	0.0117584	0.0823085	0.258684	0.195189	1.23463	1.05825	11.6408	5.1972	25.8684	6.71403	72.4315	18.1079	14251.1	1.05591	801.171	15.5556	76.1785	179.262	711.67
90	1.3	59.9	1.72	0.0067	1.09	0.009	0.017	0.09	0.125	0.25	0.228	2.43	1.36	8.7	2.47	36.7	8.3	12700	2.54767	34.4154	34.1564	212.02	61.7757	654.174
91	2.5	229	17.5	0.006	39	b.d.	0.099	0.61	0.21	2.6	0.99	16.7	6.77	34.4	8.4	92.3	22.7	14030	0.50979	1951.84	13.5928	61.2664	224.789	702.19
92*	5.64401	155.328	5.86742	b.d.	9.05394	b.d.	0.0752535	0.364509	0.154035	1.68145	0.78781	10.1122	4.25653	19.7541	5.3383	63.8479	16.2265	14968.4	0.601514	n.a.	16.0465	96.3664	131.657	769.869
93*	2.46926	101.357	1.38749	0.00705502	0.623193	b.d.	0.00587918	b.d.	0.0940669	0	0.226936	4.26829	2.57508	15.4035	3.49223	45.1521	10.1122	11993.5	n.a.	48.4277	23.6915	118.329	81.9619	701.233
Leucogranite YK1711-1a: Zircon core
Spot No.	Ti	Y	Nb	La	Ce	Pr	Nd	Sm	Eu	Gd	Tb	Dy	Ho	Er	Tm	Yb	Lu	Hf	Eu*	Ce*	(Lu/Dy)N	Hf/Y	ƩREE	Ti-in-zircon Temperature (°C)
1	0.9	745	1.42	b.d.	25.9	0.15	2.5	2.6	0.74	17.5	5.33	72	22.5	110	29.7	262	52	10310	0.334407	n.a.	7.22222	13.8389	602.92	n.c.
2	2.6	857	2.44	b.d.	32.3	0.17	1.4	3.5	1.29	16.5	5.9	77	25.9	131	31.6	281	63	11140	0.517443	n.a.	8.18182	12.9988	670.56	n.c.
3	2.7	796	3.26	0.039	25.7	b.d.	0.8	1.7	0.68	9	5.1	59	23.6	114	32.8	352	78.8	12200	0.529922	n.a.	13.3559	15.3266	703.219	n.c.
4	7.8	1384	2	b.d.	29.7	1.17	6	6.1	2.28	32.2	11.6	123	49.2	217	54.1	426	87	9680	0.495896	n.a.	7.07317	6.99422	1045.35	n.c.
5	2.9	744	1.95	b.d.	28.1	0.15	0.82	3	0.79	11.1	3.5	54.4	22.1	111	30	310	68.2	10620	0.417305	n.a.	12.5368	14.2742	643.16	n.c.
6	2.7	689	1.25	b.d.	17.6	0.33	1.41	1.01	0.62	15	5.6	54.5	22.6	111	27	253	47.8	9220	0.48555	n.a.	8.77064	13.3817	557.47	n.c.
7	5.4	940	1.46	0.021	28.6	b.d.	1.7	3.2	0.6	18.4	7.4	91	31.7	152	37.7	325	65.8	11640	0.238351	n.a.	7.23077	12.383	763.121	n.c.
8	4.9	400	1.41	b.d.	18.9	0.08	1.4	1.35	0.19	9.5	2.03	37.8	13.6	66.9	16.1	156	34.6	10400	0.161724	n.a.	9.15344	26	358.45	n.c.
9	0.9	683	0.76	b.d.	16.3	0.2	1.5	3.4	1.23	12.7	4.9	49.5	19.3	94	26.7	264	51.5	9620	0.570575	n.a.	10.404	14.0849	545.23	n.c.
10	2	1160	6.6	b.d.	52	0.43	1.7	1.32	0.92	17.3	5.2	82	37.7	184	52	491	113	10500	0.58685	n.a.	13.7805	9.05172	1038.57	n.c.
11	5.2	661	1.36	b.d.	22.4	0.34	1.4	2.3	0.29	12.8	4.1	62.2	19.8	115	26	227	48	10510	0.162921	n.a.	7.71704	15.9002	541.63	n.c.
12	5	593	2.48	0.047	27.1	0.16	1.3	2.3	1.03	8.3	3.3	48	16.8	96.9	25.6	241	54.6	10420	0.718593	75.6046	11.375	17.5717	526.437	n.c.
13	1.7	892	3.29	b.d.	41.4	0.37	1.3	2.4	1.52	15.3	4.9	72	27.3	127	35.8	325	71	12090	0.764612	n.a.	9.86111	13.5538	725.29	n.c.
14	3.2	1590	1.74	b.d.	40.9	1.41	5.5	10.8	1.9	32.9	12.4	142	57.8	272	64.4	579	125	10300	0.307251	n.a.	8.80282	6.47799	1346.01	n.c.
15	6.9	1560	5.9	b.d.	71.6	0.49	0.3	1.5	1.59	22.6	8.5	101	47.1	240	64.6	593	134.9	11590	0.832427	n.a.	13.3564	7.42949	1287.18	n.c.
16	3.5	861	3.69	0.02	32.7	0.17	0.78	1.5	0.69	12.9	4.9	68.7	27.2	136	39.3	397	91.8	10210	0.478143	135.674	13.3624	11.8583	813.66	n.c.
17	2.9	727	1.92	b.d.	34	0.19	0.92	2	0.15	11.6	4.7	58.3	23.4	114	27.6	276	56.5	11680	0.0949284	n.a.	9.69125	16.066	609.36	n.c.
18	3.2	772	1.98	b.d.	35.6	0.07	0.33	2.9	0.59	15.1	5.53	63.5	27.8	118	31.3	284	56.6	11290	0.271778	n.a.	8.91339	14.6244	641.32	n.c.
19	5	902	2.26	b.d.	36.7	b.d.	1.7	1.7	0.77	13.6	5.8	77	31.6	137	40.2	341	69.5	11910	0.488142	n.a.	9.02597	13.204	756.57	n.c.
Leucogranite YK1711-1a: Zircon mantle
20	4.4	202	2.9	b.d.	9.6	0.07	0.16	0.32	0.34	2.1	0.94	11.8	3.61	22.5	5.9	62.5	14.8	19500	1.26428	n.a.	12.5424	96.5347	134.64	748.147
21	b.d.	45.8	1.05	b.d.	10	0.08	b.d.	0.8	0.14	0.67	0.31	5.7	1.22	5.1	1.35	11.3	2.7	15260	0.582901	n.a.	4.73684	333.188	39.37	n.a.
22	3.1	153	1.47	b.d.	6.8	0	0.15	0.63	-2.63e-06	0.9	0.59	9.4	3.7	26.3	6.8	71	19.9	17700	n.a.	n.a.	21.1702	115.686	146.17	719.156
23	1.6	177	4.2	0.021	3.6	0.5	0.6	0.38	0.13	0.26	0.49	5	3.6	27.5	8.7	127	34.2	21000	1.26071	8.49954	68.4	118.644	211.981	668.871
24	3.2	189	1.4	0.033	10.9	b.d.	b.d.	b	0.16	2.5	1.63	13.7	5.9	29.1	7	66	18.5	17000	n.a.	n.a.	13.5036	89.9471	155.423	721.712
25	3.6	76.1	1.08	b.d.	8.9	b.d.	0.23	0.16	0.12	1.3	0.65	6.7	2.48	8.9	2.15	21.9	5.3	16500	0.802045	n.a.	7.91045	216.82	58.79	731.32
26	7	245	6.2	0.17	13.6	1.54	2.7	0.9	0.19	3.1	1.13	14	6.5	33.5	7.3	94	24.1	20600	0.346737	6.43046	17.2143	84.0816	202.73	789.452
27	b.d.	86.6	0.78	0.048	b.d.	b.d.	b.d.	b.d.	b.d.	b.d.	0.08	1.5	2.3	21.4	10.3	148	40.9	17750	n.a.	n.a.	272.667	204.965	224.528	n.a.
28	b.d.	81	0.88	b.d.	4.5	b.d.	0.14	b.d.	0.33	1.8	0.46	5.9	1.87	14.1	3.49	32.8	9.5	16720	n.a.	n.a.	16.1017	206.42	74.89	n.a.
29	8.3	790	13.4	b.d.	37.9	0.09	0.88	0.15	0.36	7.7	2.95	52	22.4	130	38.4	369	76.6	19700	1.02108	n.a.	14.7308	24.9367	738.43	805.502
30*	5.3	605	4.7	0.039	19	0.06	0.31	1.22	0.43	9.4	4.7	53	21.2	97	25.9	240	48.9	14200	0.387056	95.024	9.22642	23.4711	521.159	764.292
Leucogranite YK1711-1a: Zircon rim
31	2.4	208	4.58	b.d.	4.54	b.d.	b.d.	b.d.	b.d.	1.3	0.38	12.1	5.7	26.9	11.6	122	31.8	21300	n.a.	n.a.	26.281	102.404	216.32	699.04
32	2.9	50.2	1.17	0.02	3.88	b.d.	b.d.	b.d.	0.16	1.45	0.46	2.2	1.26	5.6	1.14	16	2.21	13530	n.a.	n.a.	10.0455	269.522	34.38	713.83
33	3	179	1.02	0.053	0.6	b.d.	b.d.	b.d.	b.d.	0.52	0.33	6.7	5	31.6	10.9	132	32.8	17700	n.a.	n.a.	48.9552	98.8827	220.503	716.53
34	3.3	221	8.6	0.076	10.6	0.17	0.89	0.7	0.06	3.9	0.93	15.1	5.2	30	9.8	96.6	20.8	22400	0.110693	22.5612	13.7748	101.357	194.826	724.204
35	2.1	72	1.44	0.043	9.1	0.08	b.d.	0.16	0.2	3.1	0.18	3.7	1.45	7.9	2.06	24.2	6.1	15900	0.865642	37.5362	16.4865	220.833	58.273	688.881
36	2.7	83.5	1.39	0	5.3	b.d.	b.d.	0.15	0.12	1.1	0.62	7	1.3	14.3	4	74	20	14500	0.900509	n.a.	28.5714	173.653	127.89	708.189
37	9	337	7.9	0.56	27.8	2.4	9.2	2.8	0.35	6.6	1.93	20	8.8	42.6	12.9	116	27.4	20200	0.24818	5.8014	13.7	59.9407	279.34	813.31
Phengite gneiss YK1711-1b: Zircon core
Spot No.	Ti	Y	Nb	La	Ce	Pr	Nd	Sm	Eu	Gd	Tb	Dy	Ho	Er	Tm	Yb	Lu	Hf	Eu*	Ce*	(Lu/Dy)N	Hf/Y	ƩREE	Ti-in-zircon Temperature (°C)
1	0.8	1032	1.4	0.025	19.6	0.28	2.7	4.2	1.86	15.9	7.1	75	32.6	158	43.6	426	93.1	10030	0.693807	56.6754	12.4133	9.71899	879.965	n.c.
2	3.9	1130	2.55	0.021	38.8	0.51	2	2.5	1.45	21.7	5.8	86	30.9	174	52.2	517	118	14000	0.600091	90.7036	13.7209	12.3894	1050.88	n.c.
3	2.5	840	2.65	0.16	30.8	0.34	1.3	3.9	2.09	13.3	5.9	76	26.1	140	32.4	297	59	11160	0.88458	31.9477	7.76316	13.2857	688.29	n.c.
4	2.5	370	1.81	b.d.	16.4	0.22	0.38	1.5	0.25	6.1	3.06	30	12	56.9	15.9	147	26.9	12400	0.251929	n.a.	8.96667	33.5135	316.61	n.c.
5	1.4	740	1.66	b.d.	19.4	0.42	0.9	2.1	0.58	9	4.9	55	20	110	26.7	259	56.4	12510	0.406674	n.a.	10.2545	16.9054	564.4	n.c.
6	3.3	339	2.96	0.021	15	0.08	0.79	1.29	0.81	5.9	2.3	24.8	9.9	55.8	12.8	118	27.9	13510	0.89498	88.5369	11.25	39.8525	275.391	n.c.
7	3.2	501	2.1	b.d.	20	0.07	0.61	1.5	0.12	7.4	3.36	35.6	17.1	82.2	21	186	36.2	12100	0.109792	n.a.	10.1685	24.1517	411.16	n.c.
8	4.7	487	1.67	b.d.	11.5	0.91	0.99	1.6	1.11	11.3	4	50	15.6	70	18	147	30.8	12250	0.795743	n.a.	6.16	25.154	362.81	n.c.
9	4.5	151	1.5	b.d.	5.8	0	-1.336e-05	0.49	0.42	6.4	1.02	11.7	4.4	22.5	5.5	48.4	10.4	11510	0.722953	n.a.	8.88889	76.2252	117.03	n.c.
10	11.6	930	8.8	b.d.	46.7	0.06	0.34	1.04	0.49	5.7	3.3	54	23.2	149	46.7	485	112	14830	0.613467	n.a.	20.7407	15.9462	927.53	n.c.
11	10.4	1266	10.8	b.d.	66	0.33	0.57	2	0.96	10.5	4.62	77	38.5	207	62.2	711	171	13100	0.638573	n.a.	22.2078	10.3476	1351.68	n.c.
12	8	457	4.25	0.044	30.6	0.08	0.78	0.5	0.33	4.5	2.47	33	13.9	83	19.6	208	41.1	14000	0.670613	124.778	12.4545	30.6346	437.904	n.c.
13	3.4	210	2.63	b.d.	11	b.d.	0.18	0.32	0.64	2.2	1.04	16.9	7	30.9	10.4	66	16.9	14200	2.32511	n.a.	10	67.619	163.48	n.c.
14	4.8	696	2.7	b.d.	27.6	0.33	1.2	1	0.56	8	4.7	56.5	20.3	113	32.6	307	78.1	11940	0.603521	n.a.	13.823	17.1552	650.89	n.c.
15	7.1	1030	3.35	b.d.	30.5	0.45	1.5	3	0.93	15.4	5.7	81	31.5	160	46.5	445	100	9870	0.417072	n.a.	12.3457	9.58252	921.48	n.c.
16	8.6	1101	5.5	b.d.	49.1	0.1	1.2	3.3	0.27	11.3	5.7	78	34.1	172	54	563	118	13190	0.134777	n.a.	15.1282	11.98	1090.07	n.c.
17	0.5	191	1.09	b.d.	7.8	b.d.	-1.296e-05	0.7	0.22	2.2	0.96	18.2	6.7	32	11.7	90	19.5	13700	0.540395	n.a.	10.7143	71.7277	189.98	n.c.
18	1.5	263	1.01	b.d.	7.5	b.d.	0.24	0.2	0.21	5.5	1.33	24	7.9	43	9.8	82	20.8	14130	0.61034	n.a.	8.66667	53.7262	202.48	n.c.
19	2.8	623	1.86	0.023	32.3	0.13	1.7	1.6	1.13	8.4	3.42	44	17.3	104	26.5	234	56.9	10600	0.939567	142.907	12.9318	17.0144	531.403	n.c.
20	7.6	667	2.03	0.046	28.1	0.32	0.88	2.2	0.94	12.1	4.69	57.6	22.3	102	24.6	227	47.7	9910	0.555358	56.0325	8.28125	14.8576	530.476	n.c.
21	3.1	1020	3.03	b.d.	41.1	0.1	1.3	4.2	0.28	17.8	7.8	88	31.3	159	39.3	344	72	13630	0.0987126	n.a.	8.18182	13.3627	806.18	n.c.
22	1.9	792	1.37	b.d.	22.3	0.56	0.3	2.6	0.91	9.8	3.65	57	23	124	33.6	333	67.4	9180	0.549529	n.a.	11.8246	11.5909	678.12	n.c.
23	0.1	377	1.43	b.d.	15.1	b.d.	b.d.	0.53	0.26	4.5	1.77	28.2	12.3	51	15.9	135	29.9	11690	0.51319	n.a.	10.6028	31.008	294.46	n.c.
24	2.2	860	1.69	b.d.	25.7	0.09	2.8	3.7	0.82	15.4	5	69	30.3	152	33.8	318	64	10810	0.331132	n.a.	9.27536	12.5698	720.61	n.c.
25	6.9	141	1.65	0.053	8.2	b.d.	0.18	0.26	0.3	2.7	0.54	8.9	3.9	18.1	4.7	44	8.8	15700	1.09144	n.a.	9.88764	111.348	100.633	n.c.
26	5.7	1493	1.75	b.d.	39.8	0.57	3.9	6.9	2	27.2	9.7	127	48.6	246	63.5	508	109.6	10800	0.44501	n.a.	8.62992	7.23376	1192.77	n.c.
27	3.2	1510	2.58	b.d.	34.7	0.96	5.5	6	2.3	37.2	10.4	136	52.1	229	54.1	462	91.9	9650	0.469278	n.a.	6.75735	6.39073	1122.16	n.c.
28	3.7	740	1.32	b.d.	29.7	0.21	0.44	2.4	1.04	11.8	5.9	55.2	25.8	114	29.8	246	55.6	10210	0.595711	n.a.	10.0725	13.7973	577.89	n.c.
29	3.2	195	2.64	b.d.	14.1	0.09	0.47	0.19	0.28	1.7	0.59	12.1	4.6	31	11.3	128	36.7	14620	1.50178	n.a.	30.3306	74.9744	241.12	n.c.
30	2	1465	1.43	0.037	27.7	1.01	6.5	8.1	2.7	48.1	11.2	156	50.2	225	52.1	430	82.1	9480	0.416963	34.6662	5.26282	6.47099	1100.75	n.c.
31	4.7	689	1.45	b.d.	20.4	0.17	2	2.8	0.65	13.4	5.4	55.2	21.8	98.1	23.7	237	46	9990	0.323468	n.a.	8.33333	14.4993	526.62	n.c.
32	1	178	2.05	b.d.	5.6	b.d.	0.9	0.6	0.41	2.4	1.41	16.5	6.2	30	8.2	70	14.5	14400	1.04148	n.a.	8.78788	80.8989	156.72	n.c.
33	3.9	1800	1.95	b.d.	53.2	0.76	4.5	7.3	1.5	27.2	11.3	142	49.8	273	68.3	650	132	12100	0.324485	n.a.	9.29577	6.72222	1420.86	n.c.
34	15.2	1129	2.42	b.d.	28.3	0.24	2.8	2.4	1.15	18.1	8.2	81	36.7	172	45.7	419	90.5	9240	0.531866	n.a.	11.1728	8.18423	906.09	n.c.
35	5.7	607	1.19	b.d.	18.1	0.32	1.9	2.2	0.81	15	3.6	48.4	19.3	97	21.5	207	40.2	8620	0.429811	n.a.	8.30579	14.201	475.33	n.c.
36	6.7	1370	5.1	0.044	58.1	0.49	1.9	4.5	1.11	28.1	10.6	121	42.4	206	54.4	443	91.3	11020	0.300893	95.7281	7.54545	8.0438	1062.94	n.c.
37	6.5	1290	11.1	b.d.	71	b.d.	b.d.	2.4	0.3	12.1	5.7	101	37.9	241	68.3	740	161	15700	0.169696	n.a.	15.9406	12.1705	1440.7	n.c.
38	2.5	1120	2.71	0.044	38.1	0.73	2	4	0.93	23.6	7.6	98	34.6	189	46.6	428	85	12800	0.291774	51.431	8.67347	11.4286	958.204	n.c.
39	3.7	138	2.88	b.d.	6.1	0	b.d.	0.17	0.12	1.7	1.3	11.6	4.7	26	6.2	71	16.1	13160	0.680427	n.a.	13.8793	95.3623	144.99	n.c.
40	2	1330	0.73	b.d.	27	1.48	5.1	7.7	2.9	33.2	11.2	117	42.9	194	48.5	389	75.8	9680	0.552882	n.a.	6.47863	7.2782	955.78	n.c.
41	2.9	1370	3.4	0.035	35.8	0.1	3.3	2.6	1.28	24.2	9.4	126	43.3	238	58.4	530	108.8	9420	0.491886	146.399	8.63492	6.87591	1181.21	n.c.
42	1.4	1087	2.5	0.033	26.1	0.1	2	2.6	1.33	19.7	8.3	86	34.5	183	43.9	372	81.6	9710	0.566475	109.919	9.48837	8.93284	861.163	n.c.
43	1.9	914	1.65	0.077	22	0.56	1.5	1.5	1.4	13.1	6.2	84	28.8	131	35.2	314	61.9	10200	0.962711	25.6313	7.36905	11.1597	701.237	n.c.
44	4.5	192	4.9	0.043	7.1	b.d.	0.15	b.d.	0.08	1.9	1.14	15.6	5.6	33.4	9.1	99	19	16200	n.a.	n.a.	12.1795	84.375	192.113	n.c.
45	3.5	2210	3.3	0.017	53.3	1.02	4.1	7.9	2.4	45	17.2	204	77	348	84	750	141	11330	0.388008	97.9243	6.91176	5.1267	1734.94	n.c.
Phengite gneiss YK1711-1b: Zircon mantle
46	1.3	74.6	1.6	b.d.	5.1	0.08	b.d.	0.39	0.18	1.8	0.44	5	2.21	7.4	2.05	17.8	4.51	13500	0.654867	n.a.	9.02	180.965	46.96	699.174
47	3.9	36.5	2.27	b.d.	2.98	b.d.	b.d.	0.13	b.d.	1.7	0.08	2.3	1.16	3.8	1	7.7	1.45	13560	n.a.	n.a.	6.30435	371.507	22.3	782.962
48	5.4	45	2.03	0.02	3.18	b.d.	b.d.	0.14	0.48	0.59	0.26	3.6	1.06	5.5	0.67	8.8	2.06	13780	5.09097	n.a.	5.72222	306.222	26.36	810.943
49	1.8	231	1.21	b.d.	5.4	b.d.	b.d.	0.54	0.19	2.2	1.22	17.2	6.6	25.1	6.71	61.5	13.8	13860	0.531367	n.a.	8.02326	60	140.46	722.43
50	5.5	42.5	1.75	b.d.	2.54	b.d.	b.d.	0.15	0.12	2.2	0.28	2.5	1.11	4.9	1.89	14.9	3.6	15400	0.636756	n.a.	14.4	362.353	34.19	812.569
51	2.5	53.5	2.44	b.d.	2.52	b.d.	0.46	0.53	0.06	1.1	0.24	4.4	1.9	7.6	1.11	11.1	3	15010	0.239533	n.a.	6.81818	280.561	34.02	747.19
52	1.9	96	1.27	b.d.	5.1	0.35	0.21	b.d.	0.11	1.9	0.72	8.5	2.23	10.6	2.61	19.2	3.6	14400	n.a.	n.a.	4.23529	150	55.13	726.413
53	1.9	30.7	1.32	b.d.	3.87	b.d.	0.22	0.14	0.27	0.7	0.06	2.1	0.91	3.1	0.92	8.6	1.44	13900	2.62906	n.a.	6.85714	452.769	22.33	726.413
54	b.d.	165	1.53	b.d.	4.63	b.d.	b.d.	0.34	0.15	0.8	0.87	11.3	3.7	18.2	4.6	39.8	8.3	15200	0.87671	n.a.	7.34513	92.1212	92.69	n.a.
55	b.d.	183	0.77	b.d.	5	b.d.	b.d.	0.59	0.35	2	0.83	11.7	3.99	21.3	6.2	39.7	10.2	15380	0.982146	n.a.	8.71795	84.0437	101.86	n.a.
56	3	36.9	1.04	b.d.	3.43	0.06	0.15	b.d.	b.d.	1.1	0.08	3.3	0.77	5.1	0.78	7.6	2.07	15900	n.a.	n.a.	6.27273	430.894	24.44	761.53
57	7.9	34.7	1.1	b.d.	3.8	b.d.	0.61	0.57	0.26	1.3	0.28	2.3	0.69	3.4	1.07	9.5	2.52	17500	0.92069	n.a.	10.9565	504.323	26.3	845.796
58	5	36.7	1.1	b.d.	2.24	0.07	b.d.	0.15	0.06	0.64	0.12	2.7	0.82	2.9	1.19	8.9	1.99	17700	0.590289	n.a.	7.37037	482.289	21.78	804.179
59	4.8	121	0.83	0.031	5.4	0.07	b.d.	b.d.	0.34	1.9	0.62	7.6	3.3	11.1	2.9	23	5.1	14810	n.a.	28.0448	6.71053	122.397	61.361	800.629
60	0.2	38	1.6	b.d.	3.3	b.d.	b.d.	0.57	0.07	1	0.43	2.2	1.04	6.6	1.5	12.2	3.5	16210	0.282624	n.a.	15.9091	426.579	32.41	585.719
61	3	168	1.18	0.046	4.7	b.d.	b.d.	0.18	0.06	1.5	0.79	9.7	4	25.1	5.2	50.4	11.6	15000	0.35198	n.a.	11.9588	89.2857	113.276	761.53
62	10.7	37.2	2.24	b.d.	1.92	0.1	b.d.	0.13	0.17	1.2	0.32	2.5	0.88	4.2	1.17	9	2.26	14900	1.31201	n.a.	9.04	400.538	23.85	875.399
Phengite gneiss YK1711-1b: Zircon rim
63	3.9	109	0.55	b.d.	0.87	b.d.	b.d.	b.d.	0.14	0.39	0.62	7.2	2.83	15.7	4.9	55.8	10.3	14300	n.a.	n.a.	14.3056	131.193	98.75	737.962
64	0.3	122.1	0.98	b.d.	1.19	b.d.	0.18	0.23	0.08	0.45	0.51	8.3	2.68	12.7	4	38.7	7.8	14400	0.757999	n.a.	9.39759	117.936	76.839	562.734
65	4.3	57.7	1.92	b.d.	3.32	b.d.	b.d.	b.d.	0.22	1.6	0.12	4.3	1.33	6.7	2	19.7	3.2	13630	n.a.	n.a.	7.44186	236.222	42.49	746.189
66	0.1	112	0.94	b.d.	4.08	b.d.	0.39	b.d.	0.29	0.5	1.07	8.1	2.29	13.5	3.3	26	6.3	16300	n.a.	n.a.	7.77778	145.536	65.82	505.812
67	0.1	116.8	0.43	b.d.	1.47	0.17	b.d.	b.d.	0.07	1.3	0.8	6.6	2.01	12.7	3.6	41.8	8.3	14000	n.a.	n.a.	12.5758	119.863	78.82	505.812
68	0.6	67.7	0.39	b.d.	0.78	b.d.	b.d.	0.17	0.12	0.49	0.25	4	1.52	10.2	3.6	33.6	8.2	12700	1.26738	n.a.	20.5	187.592	62.93	603.459
Leucogranite YK192-1a: Zircon core
Spot No.	Ti	Y	Nb	La	Ce	Pr	Nd	Sm	Eu	Gd	Tb	Dy	Ho	Er	Tm	Yb	Lu	Hf	Eu*	Ce*	(Lu/Dy)N	Hf/Y	ƩREE	Ti-in-zircon Temperature (°C)
1	8.7	1438	4.5	b.d.	80.4	b.d.	0.89	3.7	1.16	33.8	10.5	149	52.5	229	54.4	488	94.6	10810	0.31619	n.a.	6.34899	7.51739	1197.95	n.c.
2	5.4	1650	7.5	b.d.	72.4	0.21	0.86	2.6	0.72	24.9	11.2	137	57.5	273	64.7	562	119	9850	0.272769	n.a.	8.68613	5.9697	1326.09	n.c.
3	4.3	1930	23.5	b.d.	80.7	b.d.	0.55	1.23	0.87	14.8	9.6	151	62.4	329	88.6	837	165	12880	0.621563	n.a.	10.9272	6.67358	1740.75	n.c.
4	4.5	1580	9.3	b.d.	82.3	0.07	1.01	3.6	0.46	19.3	10.2	132	57.2	252	66.2	567	112.8	11110	0.16822	n.a.	8.54545	7.03165	1304.14	n.c.
5	4.9	2590	4.2	b.d.	75.5	0.62	4.5	5.7	3	50.8	20.1	227	90	414	104	910	178	10840	0.537404	n.a.	7.84141	4.18533	2083.22	n.c.
6	5.8	1150	2.08	0.12	38.8	0.08	1.7	3.5	0.82	16.8	8.6	93	36.5	184	43.6	392	79.4	9160	0.325967	97.0914	8.53763	7.96522	898.92	n.c.
7	3.2	1800	6	0.041	31	0.57	1.2	2.3	1.76	29.5	11.2	139	59.7	313	81	733	143	10970	0.651308	49.7184	10.2878	6.09444	1546.27	n.c.
8	4.7	3840	15.5	0.02	94.1	0.25	2.5	8	1.18	60	24.6	337	133	650	153	1380	266	11240	0.164176	326.279	7.89318	2.92708	3109.65	n.c.
Leucogranite YK192-1a: Zircon mantle																					#DIV/0!
9	b.d.	536	45.8	b.d.	18.8	b.d.	0.14	0.65	0.14	5.1	1.78	25	14.5	70.6	20.9	199	40.3	21400	0.234388	n.a.	16.12	39.9254	396.91	n.a.
10	1.2	347	36.4	b.d.	14.4	b.d.	0.31	0.15	0.08	2.7	0.9	21.7	8.6	51.9	13.4	128	29.7	24800	0.383188	n.a.	13.6866	71.4697	271.84	648.637
11	3.7	470	33.2	0.54	27.3	3.3	6.2	4.1	0.39	10.1	1.94	37	13.6	61.9	17.3	141	39.5	21600	0.18474	5.0141	10.6757	45.9574	364.17	733.583
12	2.1	462	28.8	b.d.	18.4	b.d.	b.d.	0.19	0.13	1.9	1.49	22.9	11.2	61.6	20.3	177	41.5	19900	0.659536	n.a.	18.1223	43.0736	356.61	688.881
13	1.3	448	42.5	b.d.	18.8	0.14	0.38	1.1	b.d.	2.2	2.02	27.2	10.9	59.6	18.4	183	36.4	24200	n.a.	n.a.	13.3824	54.0179	360.14	654.174
14	3	554	40.4	b.d.	20.8	b.d.	0.21	b.d.	0.06	4.3	2.11	41.7	16.1	78.9	21.8	218	42.1	26100	n.a.	n.a.	10.0959	47.1119	446.08	716.53
15	0.5	439	27.6	0.018	9.5	b.d.	b.d.	0.45	b.d.	2.3	1.32	25.3	12.6	54.6	15.8	163	37.2	22200	n.a.	n.a.	14.7036	50.5695	322.088	592.343
16	2.5	472	46.8	0.038	19.6	0.09	0.18	b.d.	0.11	3.3	2.08	24.5	13.4	75.7	21.5	215	44	25500	n.a.	82.1727	17.9592	54.0254	419.498	702.19
17	b.d.	479	18.5	0.017	13.2	b.d.	0.27	0.74	-3.67e-06	3.2	2.34	28.6	10.7	69.7	18.5	155	39	21400	n.a.	n.a.	13.6364	44.6764	341.267	n.a.
18	0.4	576	23	0.016	23.1	b.d.	0.33	0.18	0.2	5.3	2.52	35.5	15.2	86.1	22.8	239	50.3	20400	0.624173	n.a.	14.169	35.4167	480.546	579.139
19	2.9	577	29.2	b.d.	20.6	b.d.	0.39	1.1	0.79	7.5	3.3	37.2	19.3	83	19.7	209	42.7	18700	0.838396	n.a.	11.4785	32.409	444.58	713.83
20	7.1	566	54.5	b.d.	18.6	0.09	b.d.	0.35	0.048	4.7	2.89	40.6	18.6	106	31.6	350	88	22800	0.114079	n.a.	21.6749	40.2827	661.478	790.77
21	2.1	588	57.8	b.d.	12	0.08	-1.51e-05	0.54	0.15	3.5	3.2	41.5	16.6	95.1	25.8	273	68.6	32600	0.33259	n.a.	16.5301	55.4422	540.07	688.881
22	3.5	397	8.1	0.17	20.7	1.04	4.3	1.4	0.36	6.2	1.98	26.6	9.8	51	12.8	125	26.3	16580	0.37247	12.0702	9.88722	41.7632	287.65	729.004
23	2.1	446	46.5	b.d.	19.4	0.2	b.d.	0.37	0.05	3.6	1.4	29.5	11.6	64	16.8	171	29.7	23300	0.132059	n.a.	10.0678	52.2422	347.62	688.881
24	13.7	1060	217	0.22	31.3	0.52	0.65	0.86	-3.9e-06	4.3	4	63	30.8	207	62	730	181	33700	n.a.	22.689	28.7302	31.7925	1315.65	855.812
25	2.6	563	48.3	0.018	22.1	b.d.	b.d.	b.d.	b.d.	4.2	3	33.6	14.1	76	23.7	232	50.7	24200	n.a.	n.a.	15.0893	42.984	459.418	705.238
26	b.d.	566	21.5	b.d.	27.4	0.08	0.14	0.56	0.11	3.5	2.45	30.8	14.5	75.7	22.5	197	47.8	17900	0.239504	n.a.	15.5195	31.6254	422.54	n.a.
27	0.8	570	44.8	0.5	32.4	4.5	10.5	4.1	0.82	11.4	3.7	45.2	15.2	72.9	21	180	38.1	23200	0.36561	5.29588	8.4292	40.7018	440.32	621.629
28	5.2	643	37.2	0.1	35.4	0.95	3.8	1.7	0.41	7.6	3.4	41.3	15.6	94	22.3	222	47.8	21400	0.347698	28.1596	11.5738	33.2815	496.36	762.615
29	1	430	40	0.076	17.8	1.04	1.6	1.6	b.d.	5.4	2	27.5	13.2	60	17.6	161	33.7	24800	n.a.	15.5232	12.2545	57.6744	342.516	636.282
30	3.5	443	20	0.11	13.2	0.42	0.17	0.5	0.08	3.4	2.82	28	11.8	58.1	18.3	151	30.1	21000	0.187031	15.057	10.75	47.4041	318	729.004
31	4.6	518	110.7	0.024	12.8	b.d.	0.57	0.3	b.d.	2.6	1.94	34.7	14.3	69.6	17.8	183	35.6	29100	n.a.	n.a.	10.2594	56.1776	373.234	751.955
32	2.5	458	12.9	b.d.	25.6	b.d.	b.d.	1.5	0.18	4.9	2.8	29.7	12.8	58.6	16.2	156	33.6	16700	0.202385	n.a.	11.3131	36.4629	341.88	702.19
33	b.d.	446	31.5	b.d.	10.6	b.d.	b.d.	0.8	b.d.	2	1.91	28.5	12.1	52.4	17.5	144	34.7	22800	n.a.	n.a.	12.1754	51.1211	304.51	n.a.
34	7.9	762	58.8	0.18	28.1	0.28	1.8	0.7	0.26	7.9	2.98	42.9	21.6	105.5	36.8	289	72	26500	0.337023	30.6885	16.7832	34.7769	610	800.796
35	8.7	1160	61.5	b.d.	36.8	b.d.	b.d.	1.7	0.23	10.6	5.5	94	36.3	205	50	474	96	22500	0.165158	n.a.	10.2128	19.3966	1010.13	810.026
Phengite gneiss YK192-1b: Zircon core
Spot No.	Ti	Y	Nb	La	Ce	Pr	Nd	Sm	Eu	Gd	Tb	Dy	Ho	Er	Tm	Yb	Lu	Hf	Eu*	Ce*	(Lu/Dy)N	Hf/Y	ƩREE	Ti-in-zircon Temperature (°C)
1	4.1	234	1.85	b.d.	6.6	b.d.	0.72	2.3	0.22	6.4	2.2	18.6	7.1	35	8.6	79	17.8	12800	0.17479	n.a.	9.56989	54.7009	184.54	n.c.
2	1.1	528	1.28	b.d.	23.1	0.39	0.7	0.73	0.76	11.6	4	43.1	18.7	88	21	195	40.5	9710	0.796108	n.a.	9.39675	18.3902	447.58	n.c.
3	b.d.	1119	7.2	b.d.	46.4	0.44	1.05	1.6	0.8	15	6.5	97	38	190	51.5	448	88.7	12200	0.497775	n.a.	9.14433	10.9026	984.99	n.c.
4	4.5	3230	3.2	0.028	111	1.57	10.3	17.2	6.7	75	28.7	329	114	514	118	1086	199	9430	0.568629	129.801	6.04863	2.9195	2610.5	n.c.
5	5.5	404	1.94	0.016	19.7	b.d.	0.14	1.16	0.45	5.3	2.82	37.9	14	67.9	18.9	172	36.1	11180	0.553216	n.a.	9.52507	27.6733	376.386	n.c.
6	3.1	470	3.7	b.d.	21.2	0.31	0.45	0.53	0.56	6.9	2.6	30	14.7	90	21.7	233	51	11800	0.892636	n.a.	17	25.1064	472.95	n.c.
7	1.7	291	2.12	b.d.	7.4	b.d.	0.19	0.9	0.32	4.2	1.31	18.7	8.3	49	16.2	155	42.1	13900	0.50171	n.a.	22.5134	47.7663	303.62	n.c.
8	4	673	1.95	b.d.	25.8	b.d.	1.1	1.4	1.09	8.9	5.2	55.9	23.5	103.4	26	260	50.3	10120	0.941275	n.a.	8.99821	15.0371	562.59	n.c.
9	5.3	1063	1.45	0.05	78	0.44	3.3	3.6	2.47	25.6	8.7	106	37.7	172	37.7	335	61	8280	0.784286	128.934	5.75472	7.78928	871.56	n.c.
10	4.3	1000	3.02	b.d.	40.8	0.16	2.1	1.7	0.66	18.6	7	89.5	33.2	160	42.7	394	82.6	10250	0.357777	n.a.	9.22905	10.25	873.02	n.c.
11	b.d.	318	0.96	0.022	19.4	b.d.	0.14	0.9	0.33	3.4	2.7	26.9	11.2	55	15.4	139	30.2	11300	0.575046	n.a.	11.2268	35.5346	304.592	n.c.
12	4.7	1394	3.48	b.d.	50.7	0.22	1.3	3.3	1.58	20.4	9	121	47.5	235	60.8	552	115.2	10220	0.586995	n.a.	9.52066	7.33142	1218	n.c.
13	2.3	1450	9.1	b.d.	64.4	b.d.	0.69	1.46	0.55	19.6	9.1	111	50.6	238	59.8	530	102	13600	0.313406	n.a.	9.18919	9.37931	1187.2	n.c.
14	b.d.	492	1.67	b.d.	18.3	0.24	1.1	0.83	0.45	7.8	3.6	36.2	14.9	88	24.5	216	51.3	11060	0.539107	n.a.	14.1713	22.4797	463.22	n.c.
15	5.7	700	1.77	b.d.	22.1	b.d.	1.6	3.8	0.84	13	6	64	19.9	110	30.2	264	54	10170	0.364305	n.a.	8.4375	14.5286	589.44	n.c.
16	9.5	355	5.3	0.058	36.5	0.61	2.2	0.73	0.34	6.7	1.32	25.5	9.3	55.8	16.7	158	36.2	14250	0.468629	47.5772	14.1961	40.1408	349.958	n.c.
17	4.6	797	1.91	b.d.	32.1	0.11	1.6	2.9	0.77	12.8	5	67	25.2	125	36.8	302	65	9530	0.385244	n.a.	9.70149	11.9573	676.28	n.c.
18	4.7	960	6.3	b.d.	47	b.d.	1.4	3.2	1.66	14.4	5.5	80	32.6	159	42.9	359	79	14100	0.74542	n.a.	9.875	14.6875	825.66	n.c.
19	4.2	1450	6	b.d.	37.5	b.d.	0.43	1.2	0.37	18.3	7.9	107	46	236	60.4	558	115	11700	0.240677	n.a.	10.7477	8.06897	1188.1	n.c.
20	6.9	1590	10.1	0.021	34.6	b.d.	1.3	1.2	0.32	15.1	7.6	123	50.8	247	67.4	616	123	13600	0.22915	n.a.	10	8.55346	1287.34	n.c.
21	9	1630	2.15	b.d.	75	0.28	4.7	4.2	4.2	32.2	12	159	53.6	267	67.7	588	137	8010	1.10089	n.a.	8.61635	4.91411	1404.88	n.c.
22	27	400	3.45	b.d.	23.8	b.d.	0.62	b.d.	0.38	7.8	2.79	25.4	13.3	60	22.4	228	50	10320	n.a.	n.a.	19.685	25.8	434.49	n.c.
Phengite gneiss YK192-1b: Zircon mantle
23	1.5	73.8	0.59	b.d.	1.38	b.d.	b.d.	b.d.	0.16	0.46	0.32	8.1	2.22	11.7	2.5	23.5	5.4	12040	n.a.	n.a.	6.66667	163.144	55.74	709.251
24	3.8	172	2.09	b.d.	4.5	0.1	b.d.	b.d.	0.2	1.9	0.36	7.8	4.99	32.8	11.9	137	36.4	15300	n.a.	n.a.	46.6667	88.9535	237.95	780.796
25	4.9	30	1.61	b.d.	1.69	b.d.	b.d.	b.d.	b.d.	0.25	0.045	1.6	0.64	2.3	0.7	10.3	2.22	13600	n.a.	n.a.	13.875	453.333	19.745	802.419
26	0.8	299	5.3	b.d.	13	b.d.	b.d.	0.52	0.08	2.6	1.71	17.2	8.5	41.1	13.5	127	27.3	15600	0.209725	n.a.	15.8721	52.1739	252.51	666.629
27	b.d.	135	2.21	b.d.	1.52	b.d.	0.39	b.d.	0.11	1.2	0.78	13.1	4.5	16.1	3.66	39.9	8.1	13000	n.a.	n.a.	6.18321	96.2963	89.36	n.a.
28	3.1	117	1.33	b.d.	8.7	b.d.	0.26	0.14	0.23	2.3	0.78	8.3	3.23	15.1	2.79	25.4	6.2	14000	1.23552	n.a.	7.46988	119.658	73.43	764.156
29	2.5	113	2.44	b.d.	23.6	0.36	0.75	b.d.	0.14	3.9	0.82	10.7	2.74	13.3	2.8	26.9	4	13730	n.a.	n.a.	3.73832	121.504	90.01	747.19
30	3.2	39.5	0.17	0.045	2.51	b.d.	b.d.	0.55	0.07	1.6	0.43	3.5	0.98	4.7	1.3	8.2	1.59	12700	0.22746	n.a.	4.54286	321.519	25.475	766.712
31	1.2	182	1.41	b.d.	1.74	b.d.	b.d.	b.d.	0.24	0.68	0.39	11.6	5.6	21.6	7.4	78	20.1	17000	n.a.	n.a.	17.3276	93.4066	147.35	693.637
32	4.7	29	1.58	b.d.	0.51	b.d.	b.d.	0.3	0.06	b.d.	0.34	1.8	0.85	3.8	1.02	6	1.1	13630	n.a.	n.a.	6.11111	470	15.78	798.808
33	5.6	234	2.63	b.d.	12.5	0.1	b.d.	1.3	0.36	0.28	0.96	17.7	5.9	32	7.8	77	15.7	10810	1.81887	n.a.	8.87006	46.1966	171.6	814.172
34	3.8	569	1.85	0.032	4.1	0.11	0.15	0.94	0.74	4.1	2.07	33.9	13.9	81.9	25.7	283	74.9	13100	1.14901	16.9433	22.0944	23.0228	525.542	780.796
35	0.9	282	4.58	0.02	15.2	b.d.	0.22	0.55	0.24	4	0.92	20	8.2	40.1	9.9	88	17.4	17400	0.493229	n.a.	8.7	61.7021	204.75	674.3
36	1.4	174	1.16	b.d.	2.17	b.d.	0.27	b.d.	0.13	1.12	0.84	15.1	3.6	26.2	8.2	82.3	22.3	16500	n.a.	n.a.	14.7682	94.8276	162.23	704.364
37	b.d.	76.5	0.9	b.d.	0.73	b.d.	b.d.	b.d.	b.d.	0.55	0.22	4.2	1.83	10.1	2.73	37	6.1	12840	n.a.	n.a.	14.5238	167.843	63.46	n.a.
38	1.7	133	1.2	b.d.	0.72	b.d.	b.d.	0.34	0.23	1.1	0.33	6.9	3.25	24.2	9.2	101	22.2	14200	1.14641	n.a.	32.1739	106.767	169.47	718.256
39	2.5	65.5	1.63	b.d.	2.8	b.d.	b.d.	b.d.	0.07	0.8	0.69	5.1	2.25	6.6	2.56	20.4	4.17	13400	n.a.	n.a.	8.17647	204.58	45.44	747.19
40	b.d.	193	0.91	0.024	0.11	0.19	b.d.	b.d.	b.d.	1	0.06	5.9	5.3	29.9	11.6	122	25.9	15800	n.a.	0.399388	43.8983	81.8653	201.984	n.a.
41	4.9	247	3.6	b.d.	8.2	b.d.	b.d.	b.d.	0.29	1.9	1.38	16.4	6	28.6	8.8	71	15.5	13600	n.a.	n.a.	9.45122	55.0607	158.07	802.419
42*	1.8	149	1.08	b.d.	b.d.	b.d.	b.d.	b.d.	b.d.	0.24	0	2.3	2.72	39.8	16.8	236	61	15500	n.a.	n.a.	265.217	104.027	358.86	722.43
43*	2.4	198	0.3	0.035	b.d.	b.d.	b.d.	b.d.	b.d.	0.6	0.11	5.6	5	39.3	14.3	157	39	13430	n.a.	n.a.	69.6429	67.8283	260.945	744.04
Phengite gneiss YK192-1b: Zircon rim
44	1.4	177	1.69	b.d.	13.8	0.07	b.d.	0.65	0.25	3.5	1.41	12.6	4.9	22.2	4.5	44.5	9.1	14280	0.505241	n.a.	7.22222	80.678	117.48	659.364
45	3.5	150	1.5	b.d.	0.93	0.17	b.d.	0.17	0.14	b.d.	0.48	7.2	4.29	27.5	8.6	89	16.1	15700	n.a.	n.a.	22.3611	104.667	154.58	729.004
46	b.d.	180	1.02	b.d.	4	b.d.	b.d.	b.d.	0.2	2.5	0.95	11.7	6.7	26.4	7.6	73.1	18.9	15000	n.a.	n.a.	16.1538	83.3333	152.05	n.a.
47	3.5	104.6	0.25	b.d.	0.51	b.d.	b.d.	b.d.	0.08	1.6	0.44	4.5	2.51	15.9	4.9	52	11.1	13090	n.a.	n.a.	24.6667	125.143	93.54	729.004
48	1.5	146.7	1.05	b.d.	1.4	b.d.	b.d.	b.d.	0.06	2	0.65	10.9	4.3	24.4	6.2	50.2	10	13400	n.a.	n.a.	9.17431	91.3429	110.11	664.251
Note: 'b.d.' represents 'below detection; 'n.a.' represents 'not applicable'
